# Supplementary material for: Loss of RET Promotes Mesenchymal Identity in Neuroblastoma Cells
Source: MDPI journal article supplement (doi:10.3390/cancers13081909), 2021-04-15

Loss of RET promotes mesenchymal identity of neuroblastoma cells

Original images

Fig 1-A

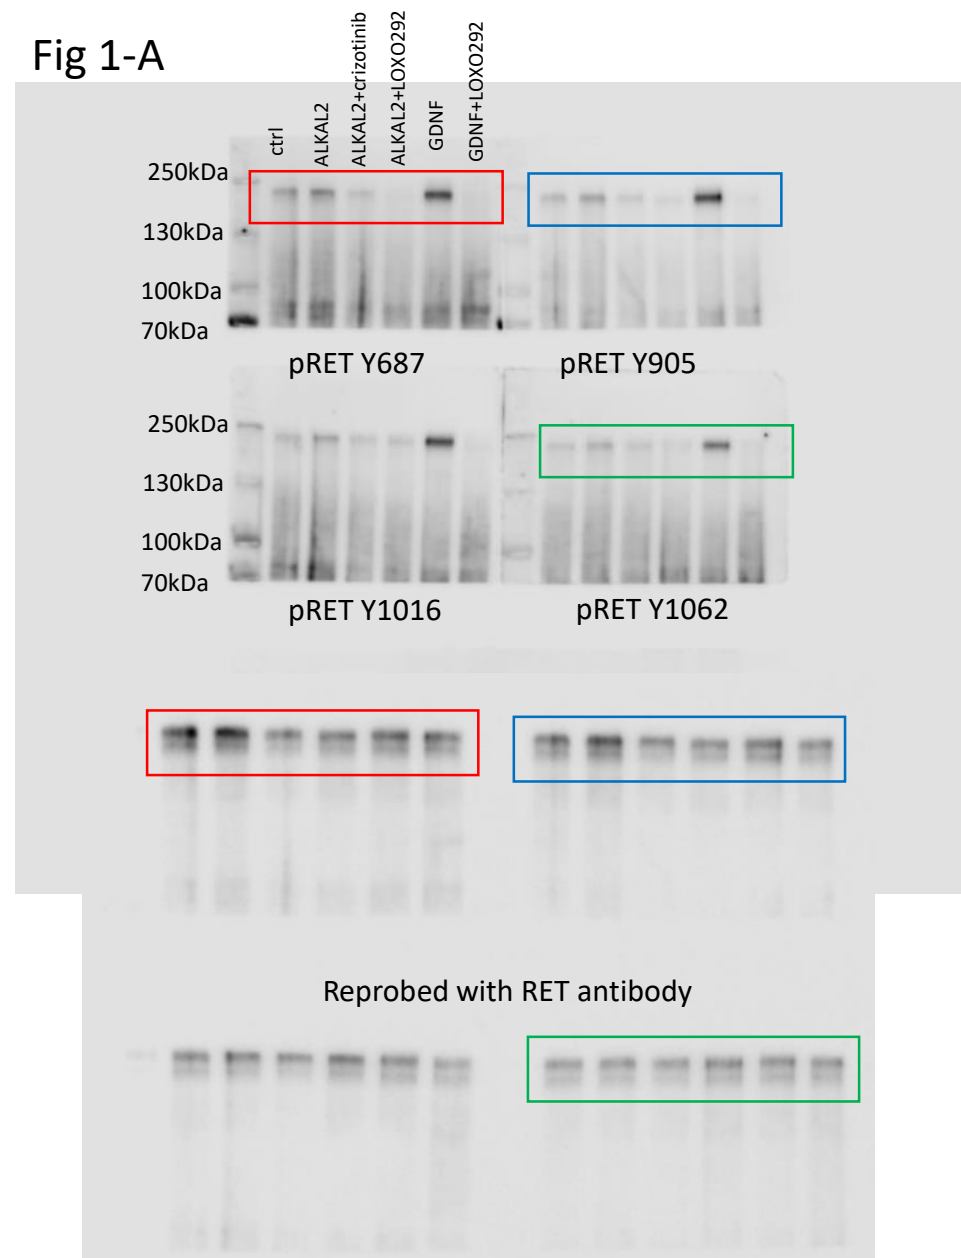

Fig 1-B

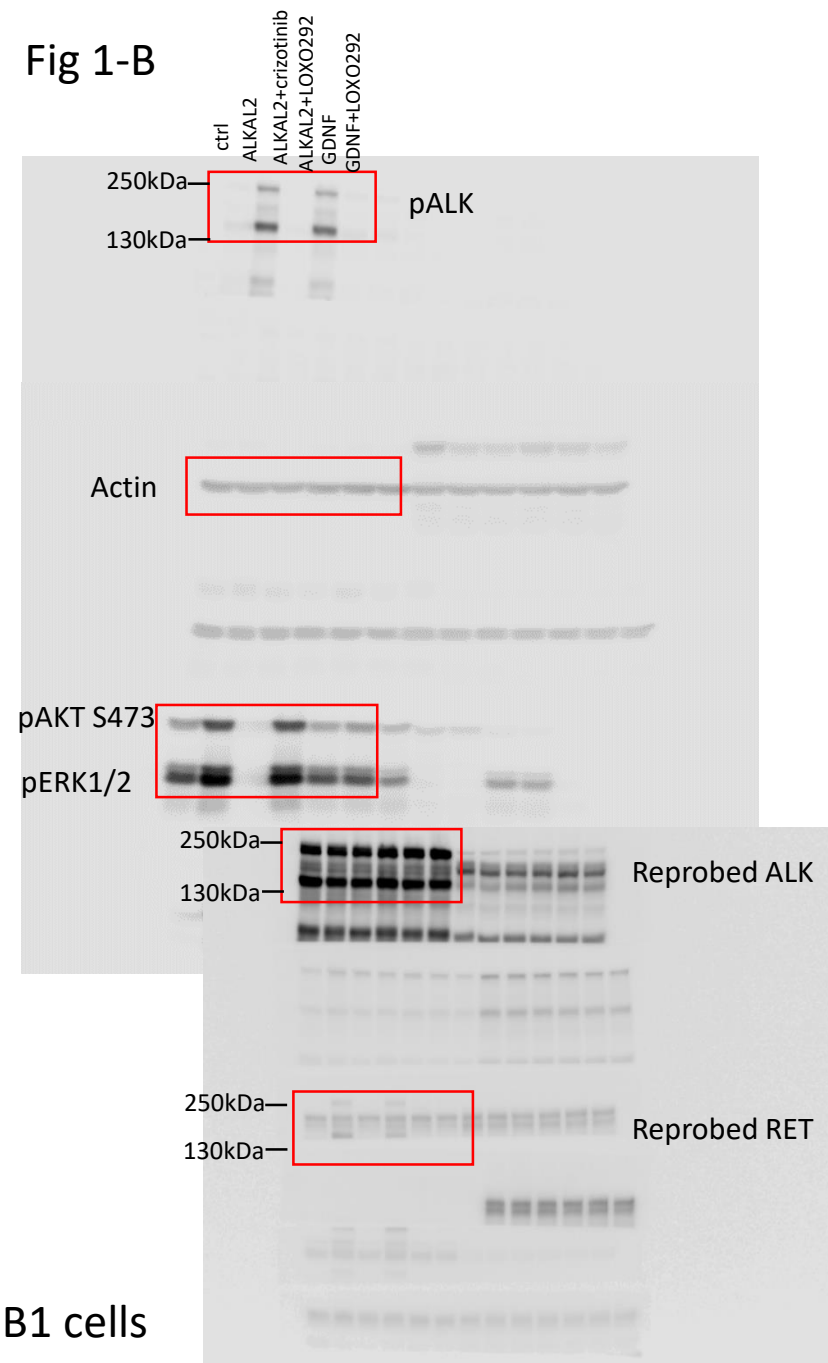

NB1 cells

Fig 1C

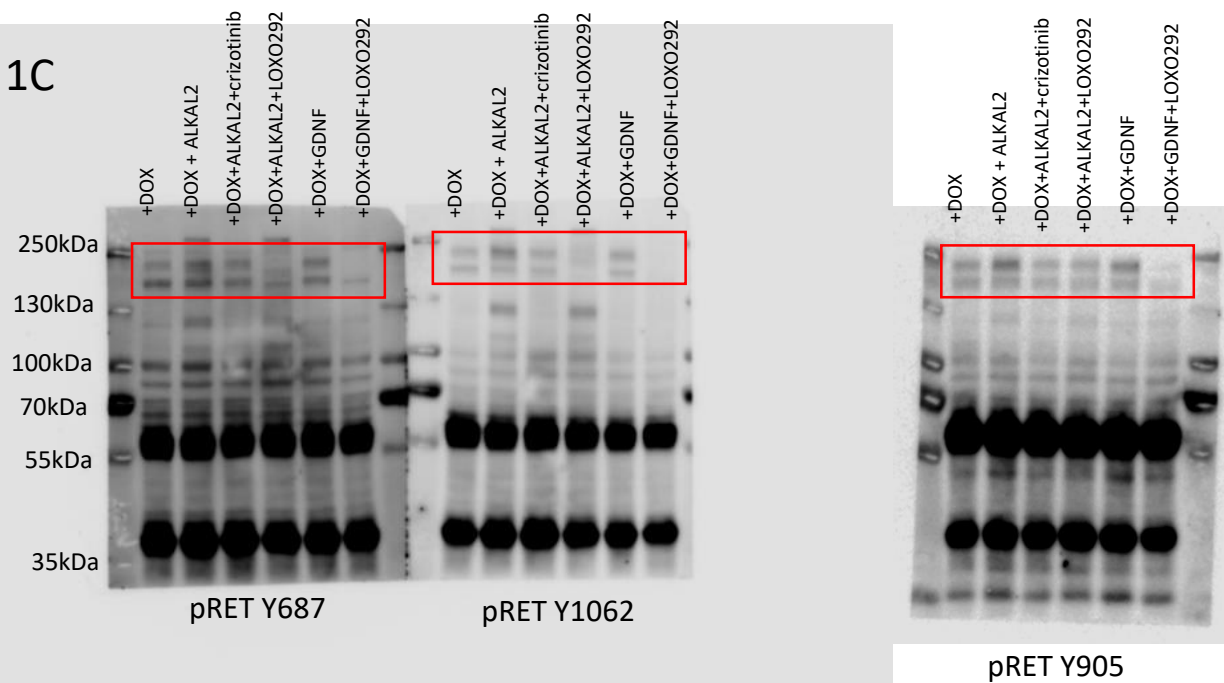

Reprobed with RET antibody

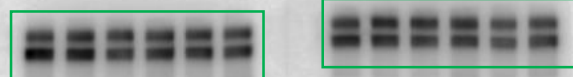

pRET Y905

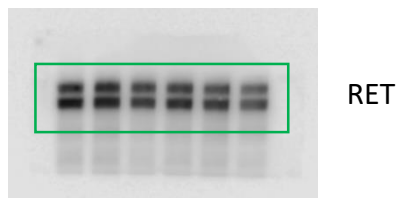

RET

SK-N-AS (ALK teton) cells

Fig 1D

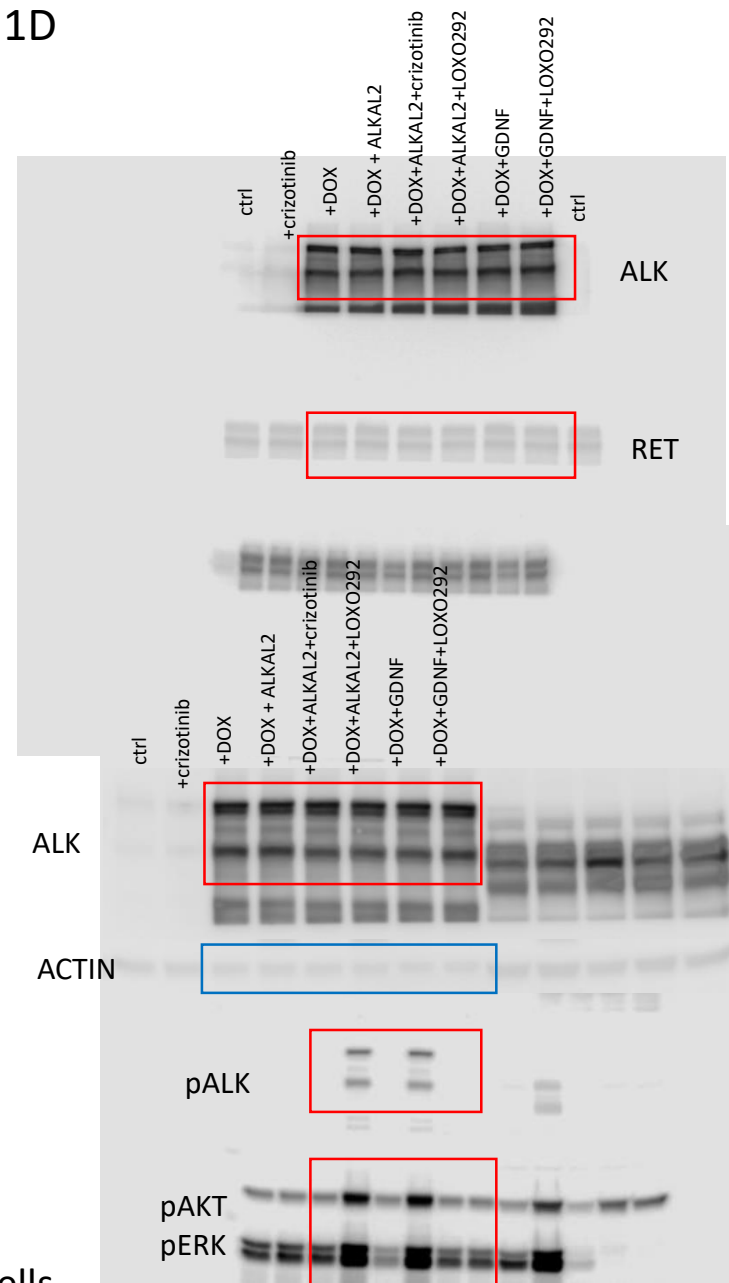

Fig. 2A-B ALK IP RET in NB1 cells.

Fig. 2A

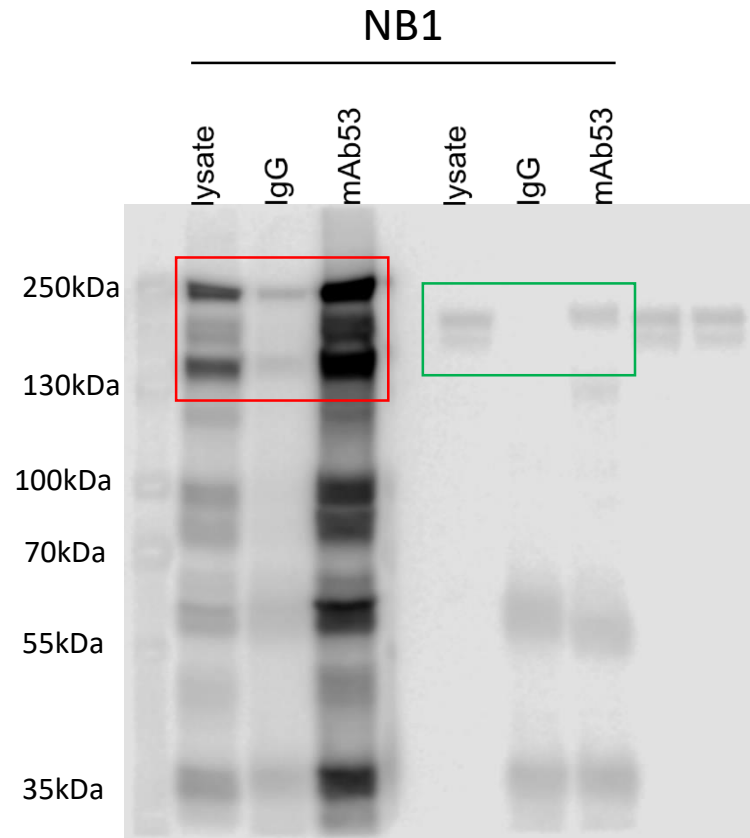

Fig. 2B

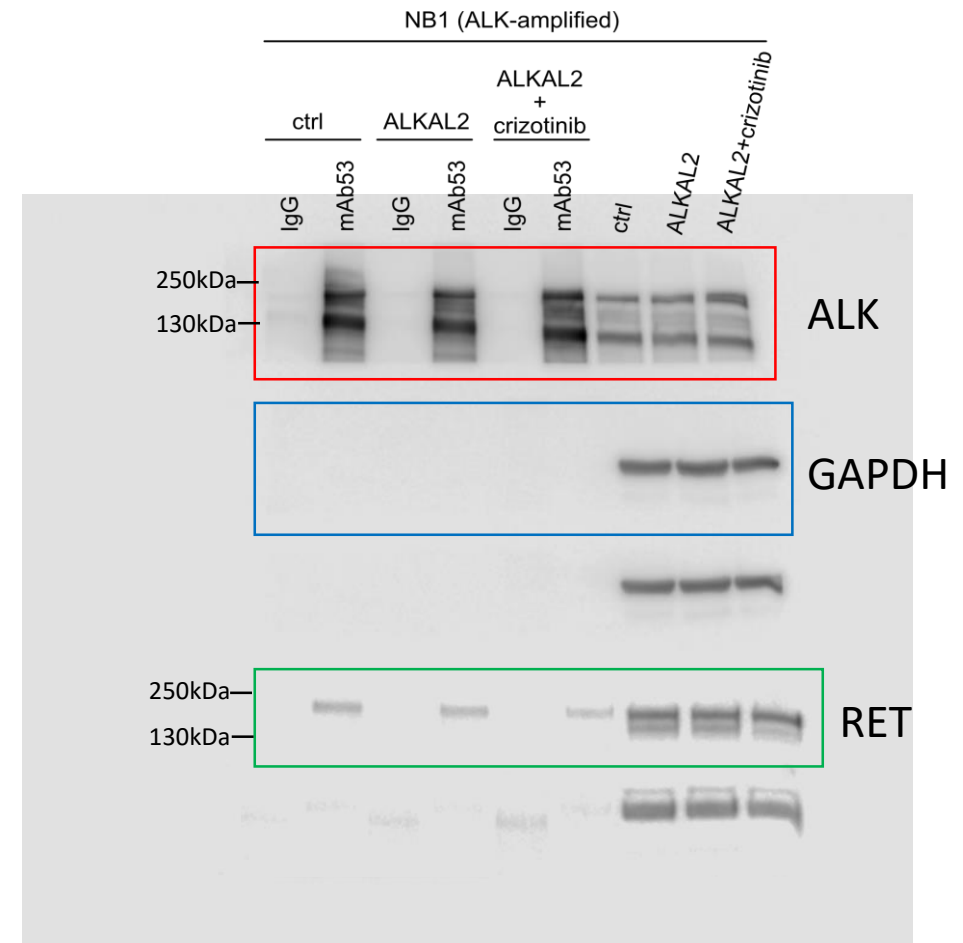

Red box: ALK blot used in main figure

Green box: RET blot

Blue box: GAPDH control

Fig. 2C-ALK IP RET in SK-N-AS (ALK teton) cells

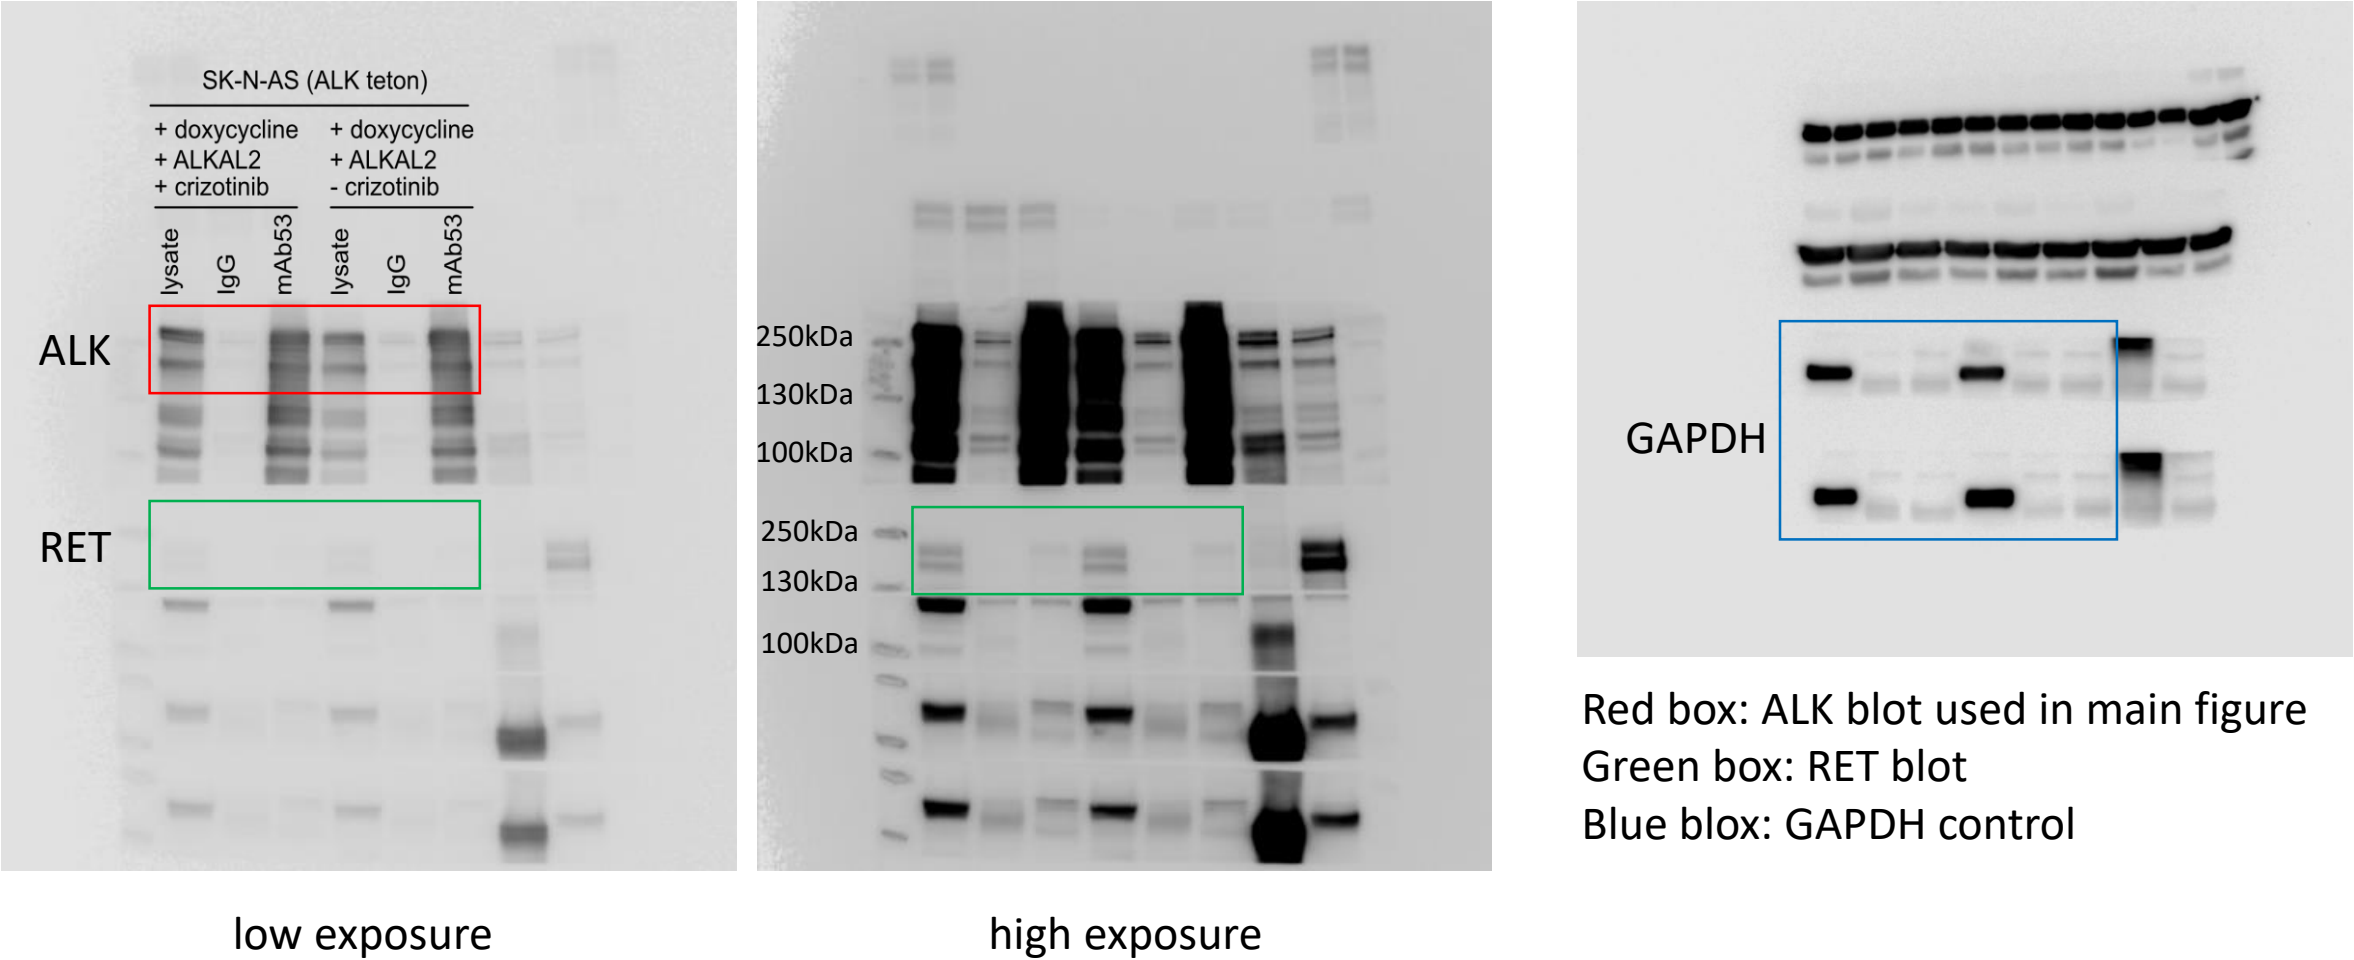

Fig 3A

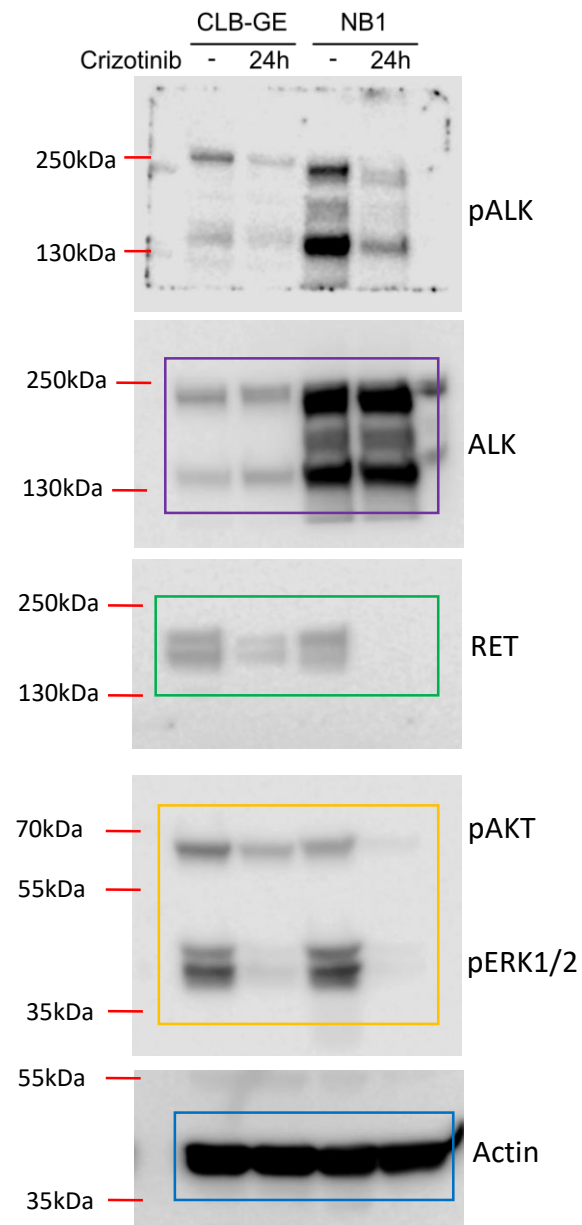

Fig 3B

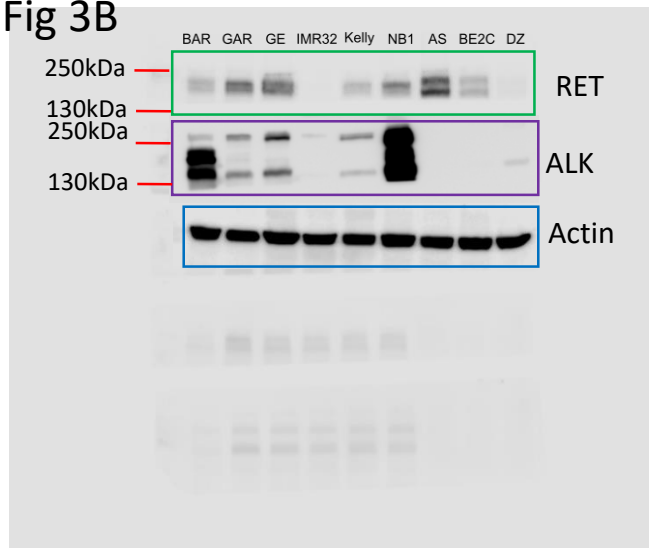

Fig 3C

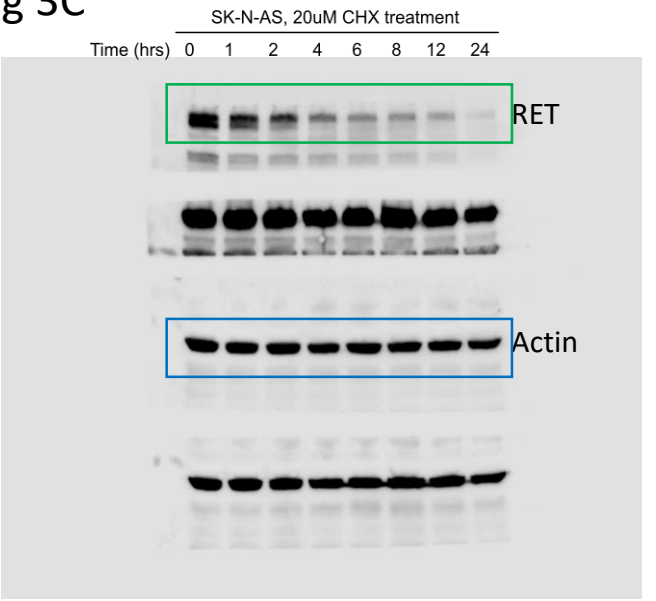

Fig 3D

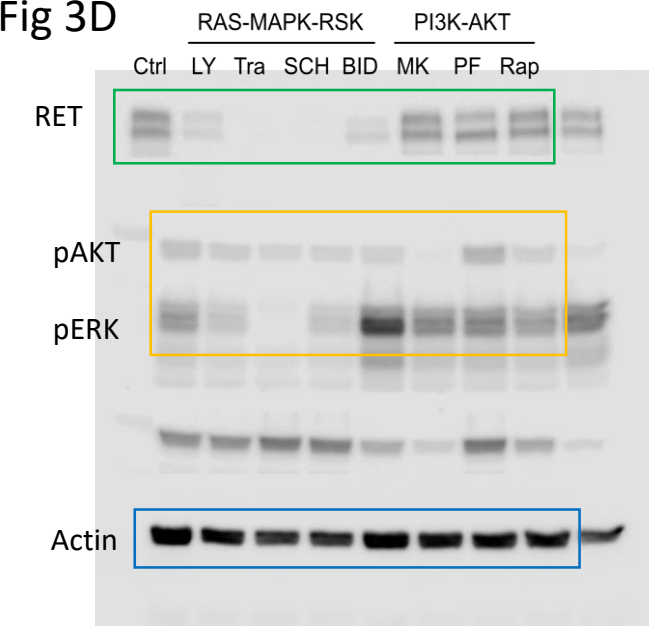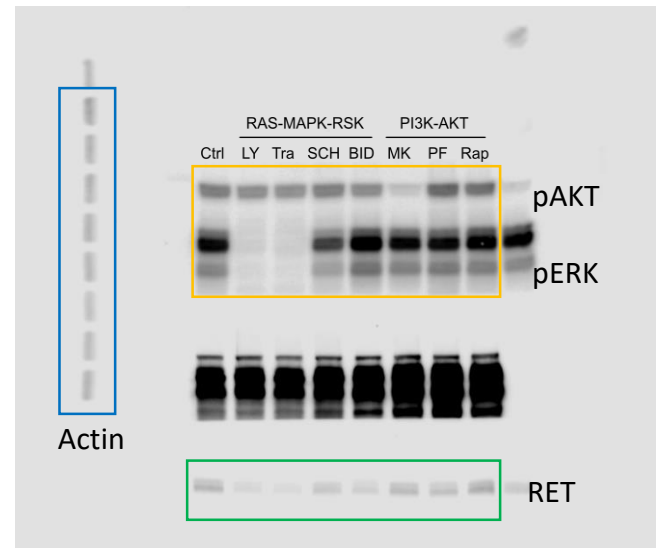

Fig. 3E-time course of treatment with tra and LY

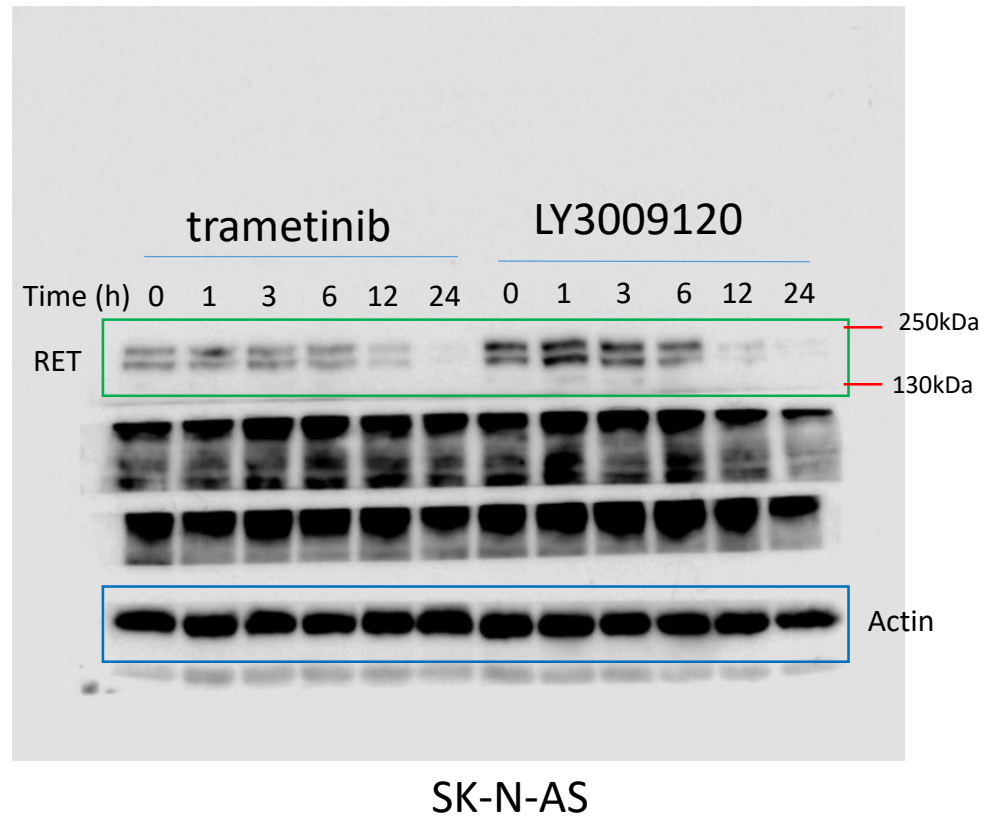

Fig. 4A-confirmation of RET expression in different clones

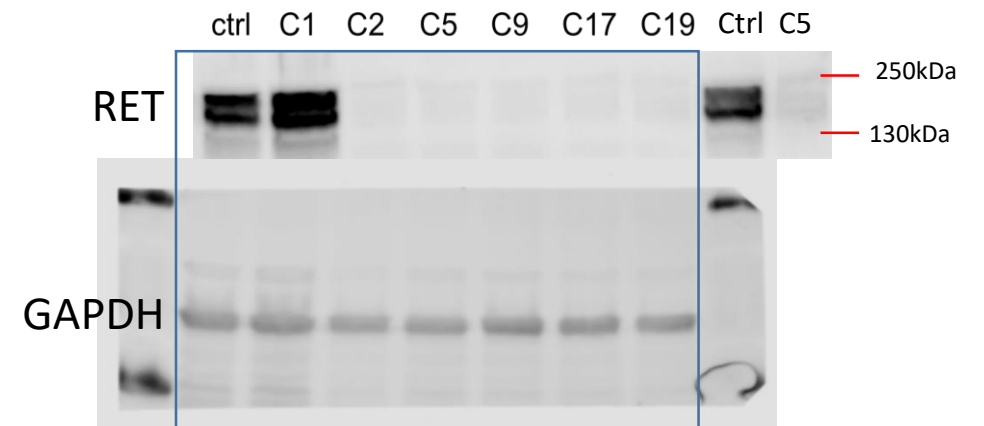

Fig. 7A

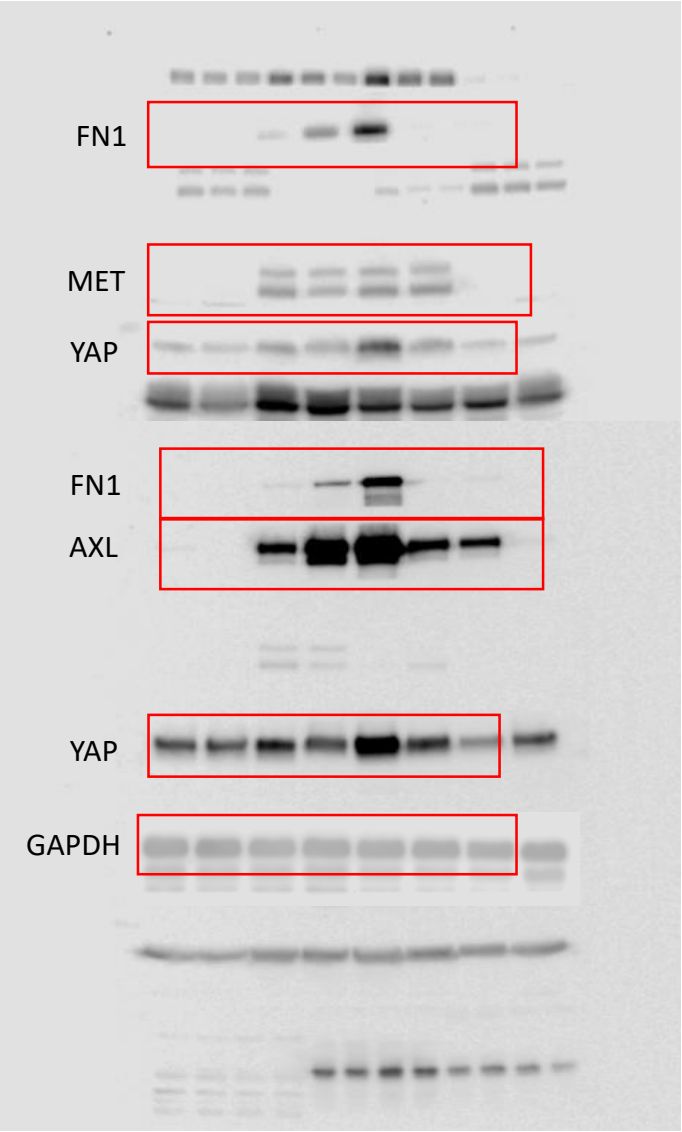

Fig. 7B

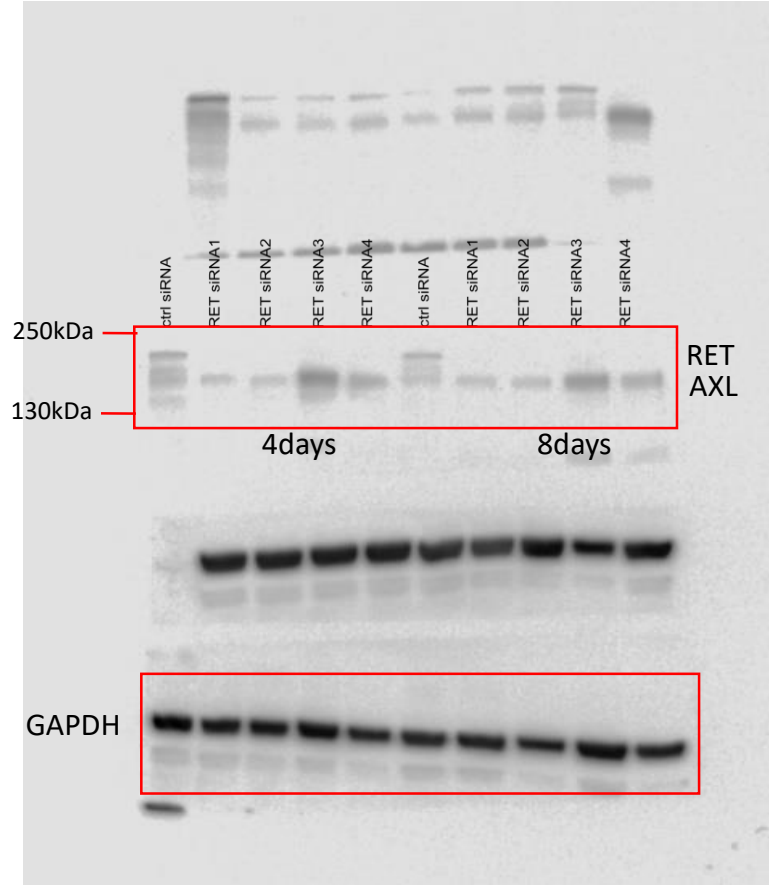

Fig. 7C

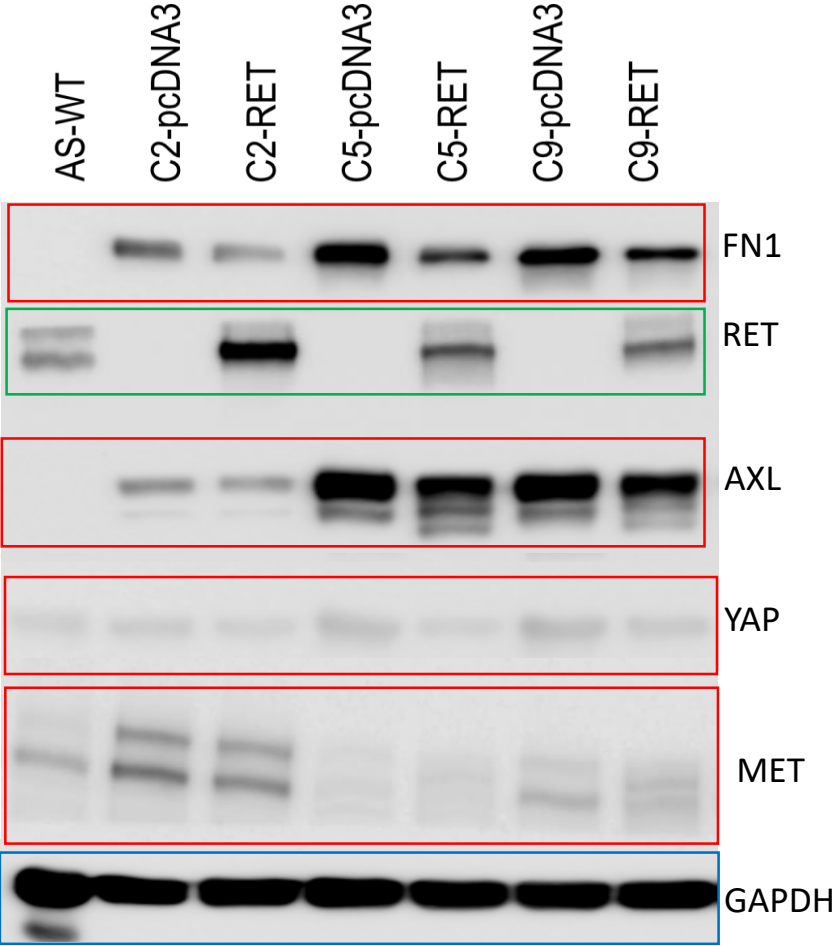



Fig. 9D

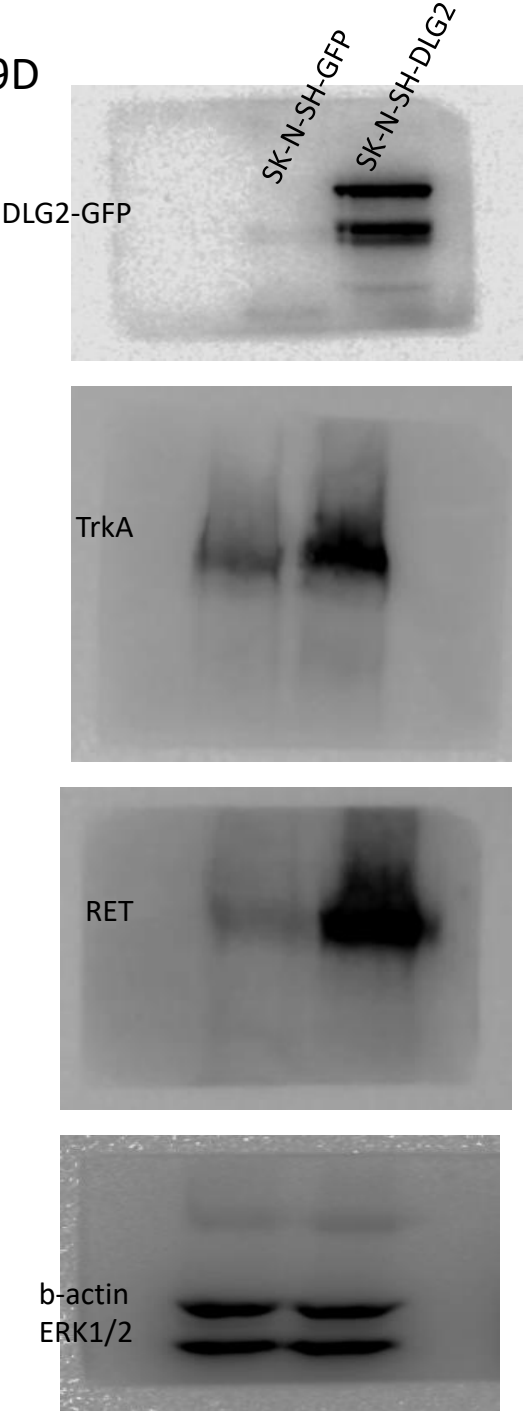

Fig. 9F

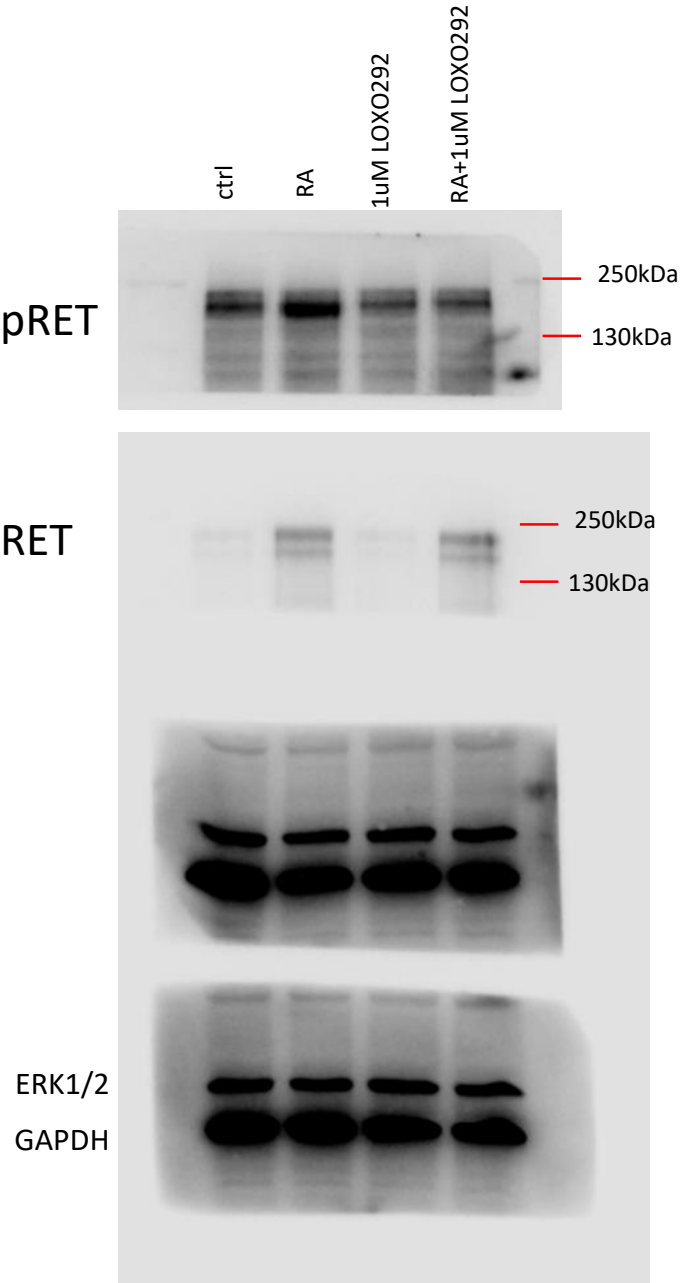

Fig S1-A: Cross-reaction of pRET antibodies to phosphorylated ALK

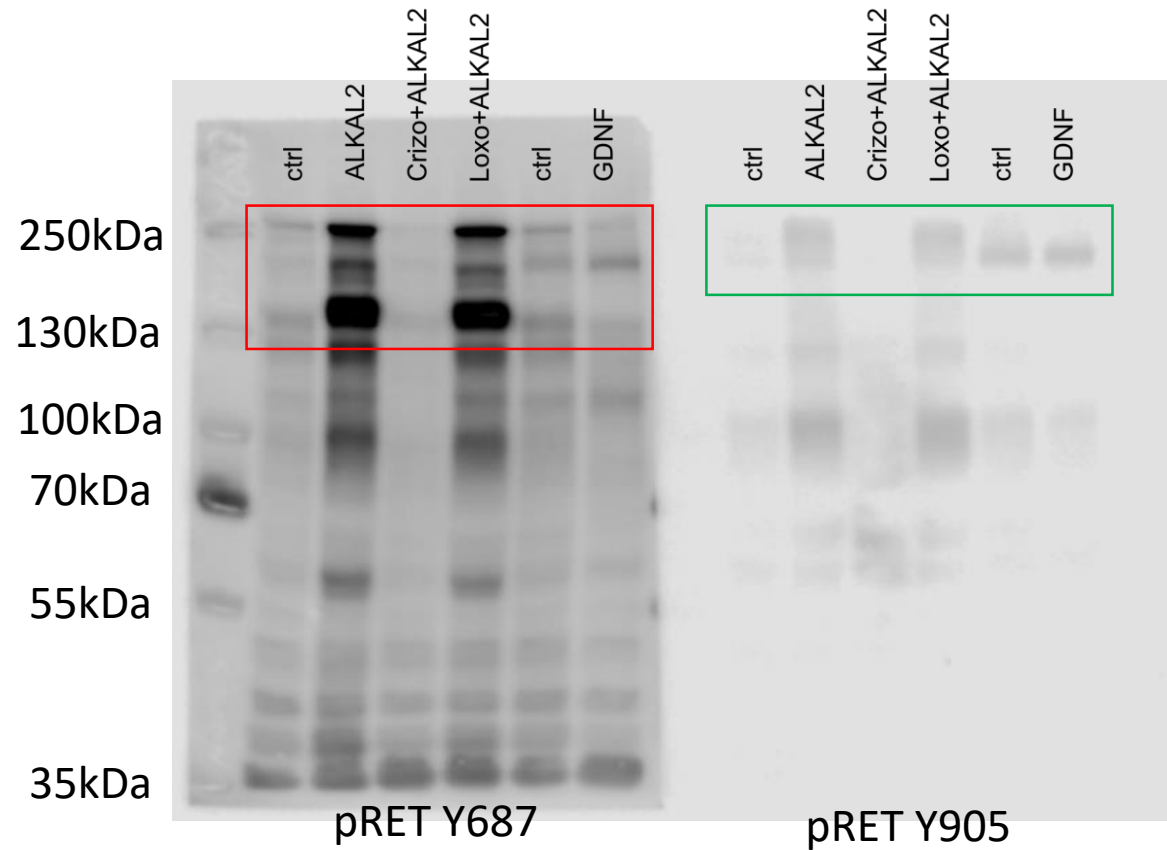

Due to hyperactivation of ALK upon stimulation with its ligand ALKAL2, pALK can also be detected with pRET antibodies. To avoid this cross-reaction, RET IP was performed to pull down total RET and then blot with pRET (see figure 1).

Fig. S1B: test ALK monoclonal antibody mAb53. The use of this antibody has not been published somewhere, so here to verify it.

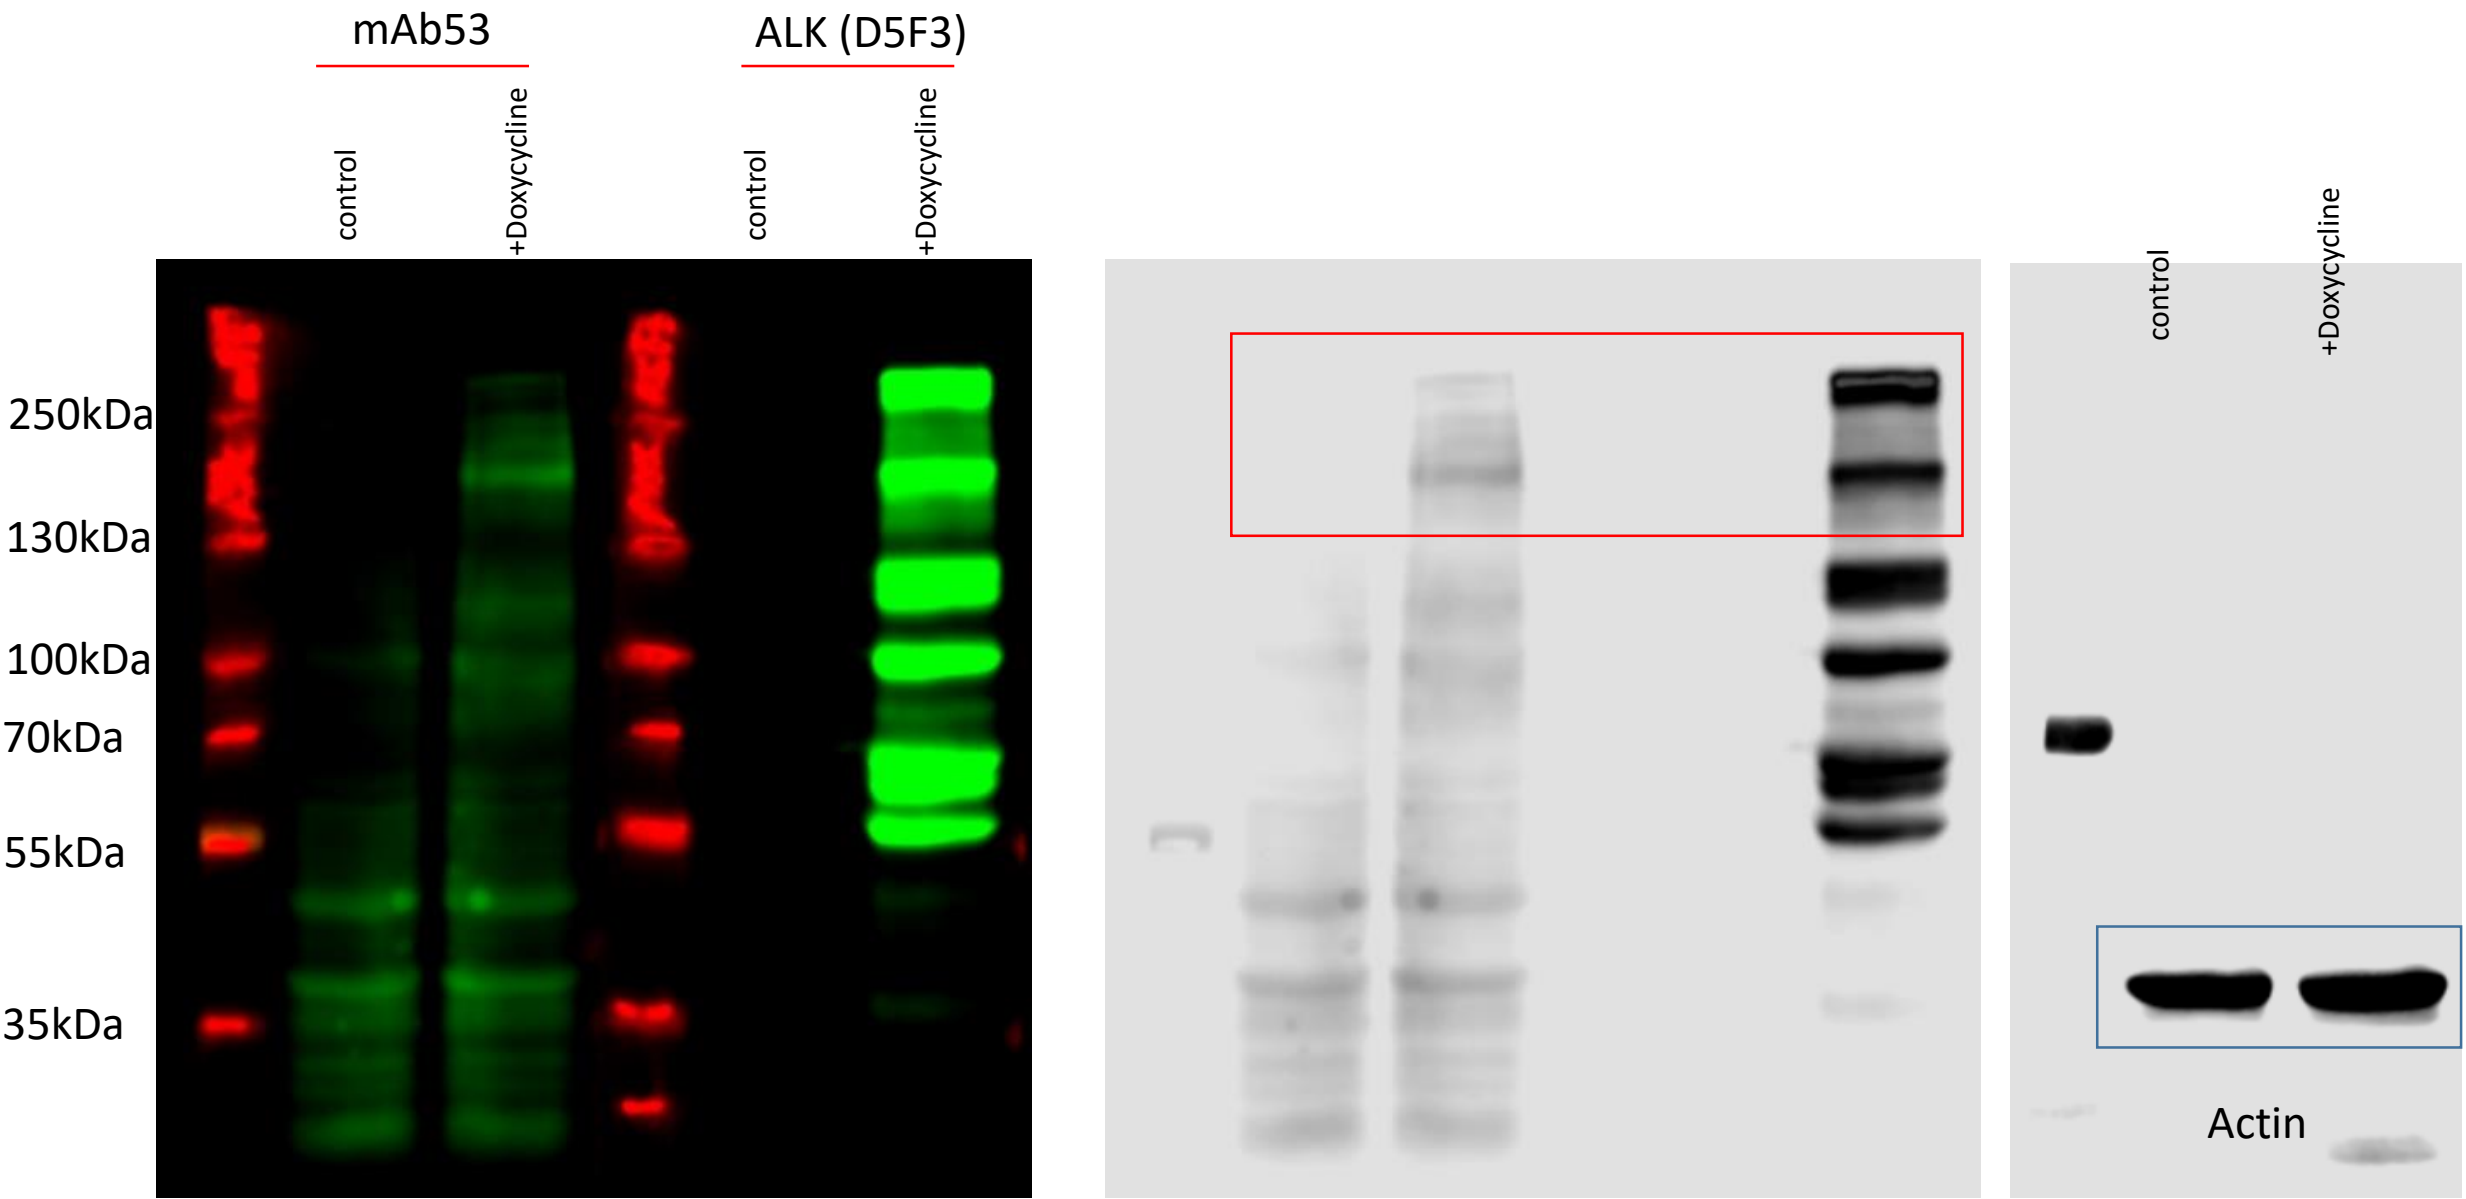

SK-N-AS (ALK teton)

Fig S2. RET stimulation or inhibition in different ALK-driven NB cell lines.

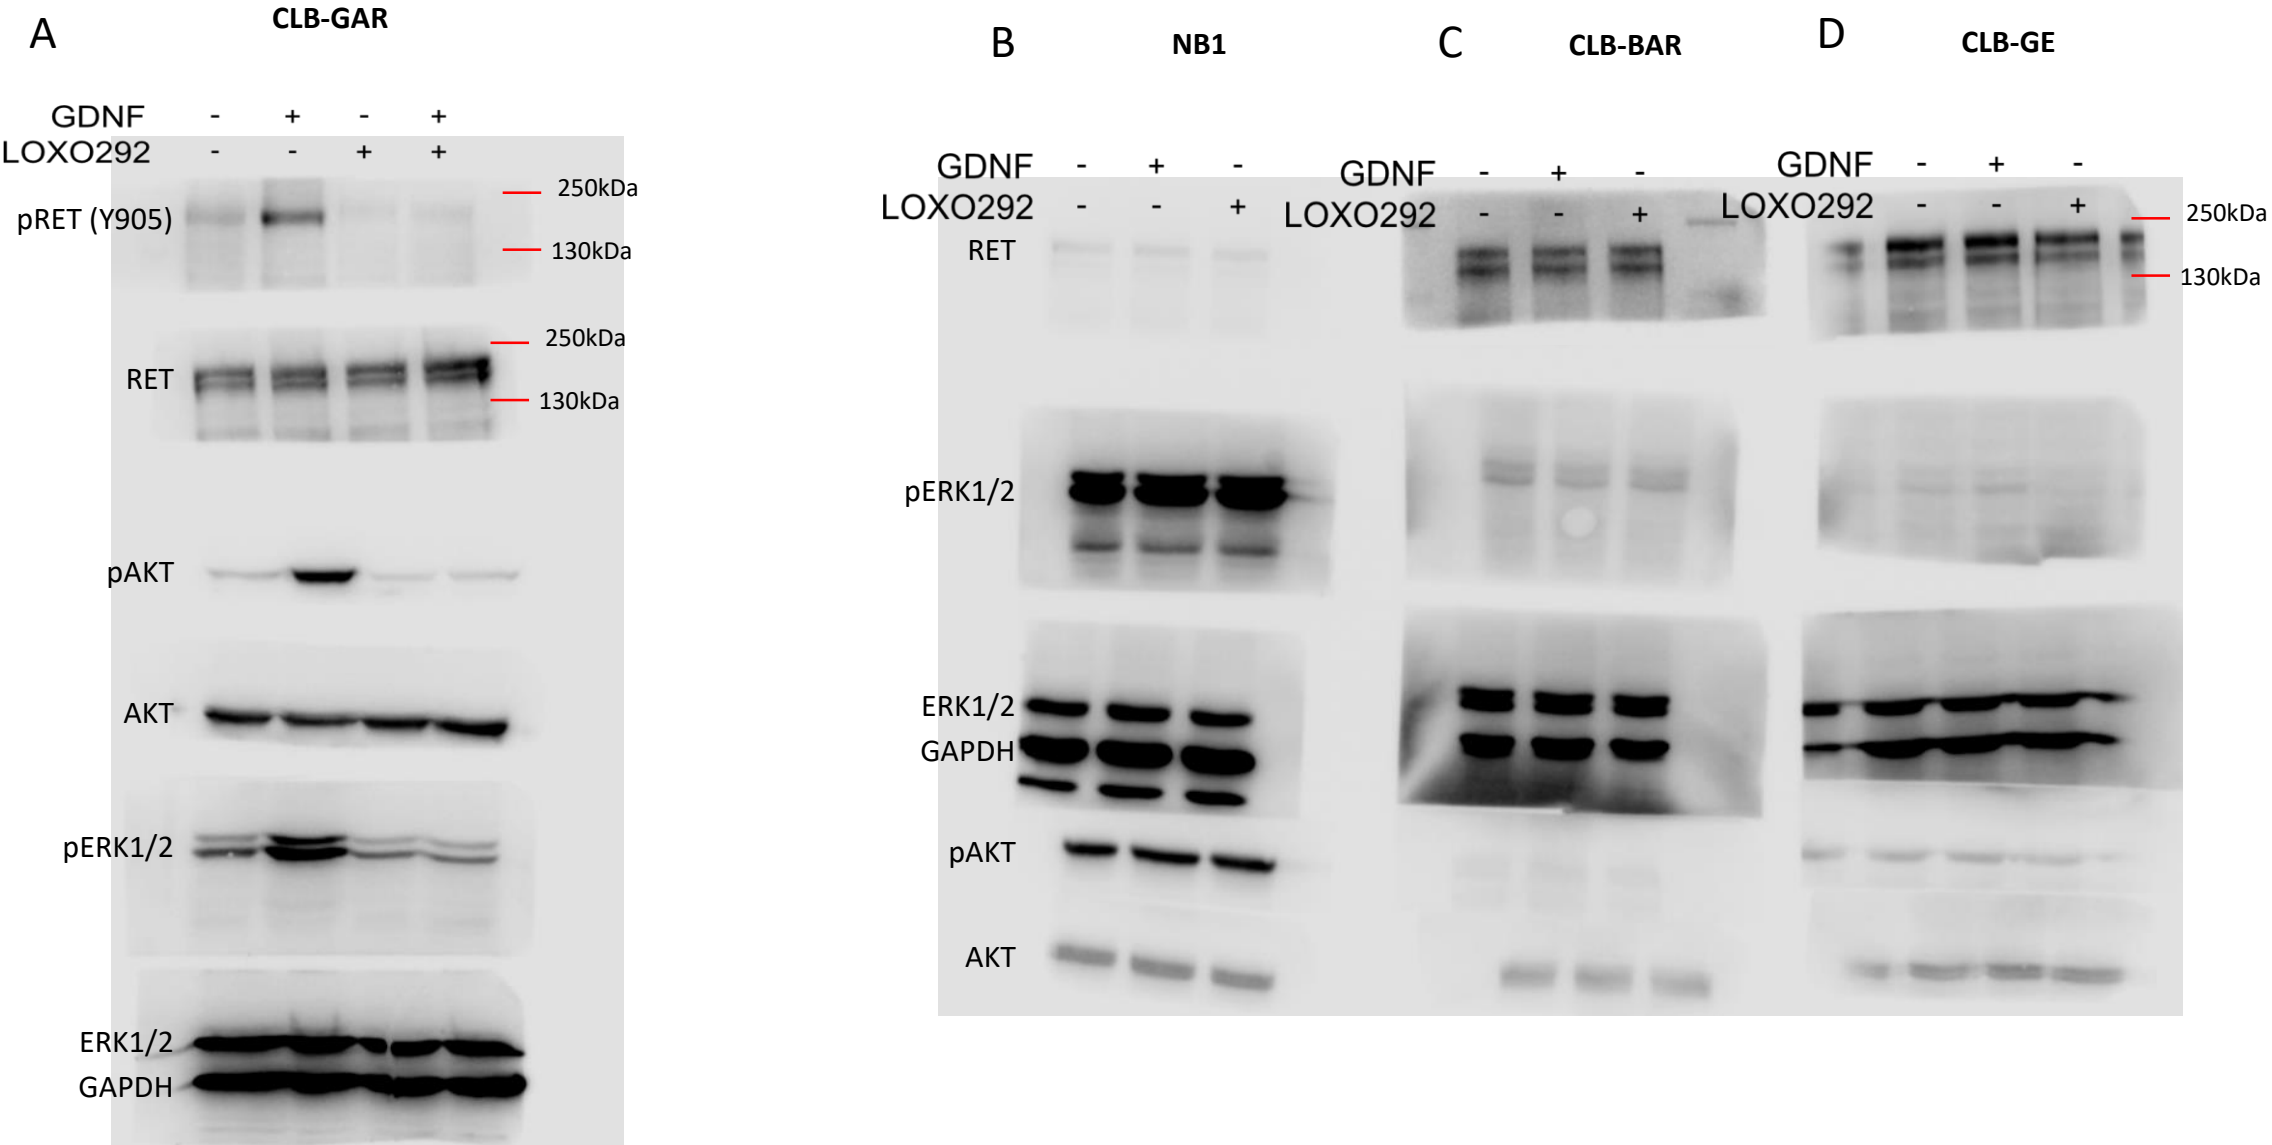

Supplement: s1 [file s1]
